# Supplementary material
Source: PubMed Central journal article supplement (PMC9762748)
Supplement: mmc1.pdf [file mmc1.pdf]

# THE LANCET

## Infectious Diseases

### Supplementary appendix

This appendix formed part of the original submission and has been peer reviewed. We post it as supplied by the authors.

Supplement to: Bardsley M, Morbey RA, Hughes HE, et al. Epidemiology of respiratory syncytial virus in children younger than 5 years in England during the COVID-19 pandemic, measured by laboratory, clinical, and syndromic surveillance: a retrospective observational study. *Lancet Infect Dis* 2022; published online Sept 2. [https://doi.org/10.1016/S1473-3099\(22\)00525-4](https://doi.org/10.1016/S1473-3099(22)00525-4).

**Supplementary Table 1: Specification of study indicators and reporting statistics per surveillance system**

| <b>Surveillance system</b>                         | <b>Study indicator</b>                                                                                             | <b>Numerator</b>                                                                                                                                                                                                                                                                                              | <b>Offset (where applicable)</b>                                                     | <b>Population coverage</b>   |
|----------------------------------------------------|--------------------------------------------------------------------------------------------------------------------|---------------------------------------------------------------------------------------------------------------------------------------------------------------------------------------------------------------------------------------------------------------------------------------------------------------|--------------------------------------------------------------------------------------|------------------------------|
| <i>Laboratory</i>                                  |                                                                                                                    |                                                                                                                                                                                                                                                                                                               |                                                                                      |                              |
| Second Generation Surveillance System (SGSS)       | <b>Number of RSV cases among children under five years old</b>                                                     | Number of RSV cases among children under five years old                                                                                                                                                                                                                                                       | Not available                                                                        | 100% England population      |
| Respiratory DataMart System (RDS)                  | <b>RSV test-positivity among children under five years old</b>                                                     | Number of RSV positive tests by PCR among children under five years old                                                                                                                                                                                                                                       | Number of RSV positive and negative tests by PCR among children under five years old | Sentinel laboratories *      |
| <i>Clinical</i>                                    |                                                                                                                    |                                                                                                                                                                                                                                                                                                               |                                                                                      |                              |
| Hospital Episode Statistics (HES)                  | <b>Number of admissions for RSV-attributable respiratory disease among children under five years old</b>           | Number of hospital admissions among children under five years old with a primary diagnosis of ICD-10 codes for: <ul style="list-style-type: none"> <li>• bronchiolitis (J21)</li> <li>• pneumonia (J12-18),</li> <li>• unspecified LRTI (J22)</li> <li>• bronchitis (J20)</li> <li>• URTI (J00-06)</li> </ul> | Number of coded hospital admissions among children under five years old              | All NHS hospitals in England |
| <i>Syndromic</i>                                   |                                                                                                                    |                                                                                                                                                                                                                                                                                                               |                                                                                      |                              |
| NHS 111                                            | <b>Number of calls for cough among children under five years old</b>                                               | Number of calls for cough among children under five years old                                                                                                                                                                                                                                                 | Total number of calls                                                                | 100% England population      |
| GP in-hours syndromic surveillance system          | <b>Number of in-hours consultations URTI and LRTI among children under five years old</b>                          | Number of consultations UTRI and LTRI among children under five years old                                                                                                                                                                                                                                     | Number of registered patients                                                        | ~60% England population      |
| GP out-of-hours syndromic surveillance system      | <b>Number of out-of-hours consultations for acute bronchitis/bronchiolitis among children under five years old</b> | Number of consultations for acute bronchitis/bronchiolitis among children under five years old                                                                                                                                                                                                                | Total number of coded consultations                                                  | ~80% England population      |
| Emergency department syndromic surveillance system | <b>Number of ED attendances for acute bronchitis/bronchiolitis among children under five years old</b>             | Number of ED attendances for acute bronchitis/bronchiolitis among children under five years old                                                                                                                                                                                                               | Not included in study                                                                | 109 EDs across England       |

\*Birmingham, Bristol, Cambridge, UKHSA Respiratory Virus Unit, King's College Hospital (London), Leeds, Leicester, Manchester, Newcastle, Nottingham, Royal Free Hospital (London), Southampton and Truro laboratories.

**Supplementary Table 2: Total indicator activity during winter seasons (week 40-10) among children under five years-old since 2015/16, and percentage change for 2020/21 and 2021/22**

| Indicator and age group                                     | Winter season |         |         |         |         |                |             |                      |                     |                      |
|-------------------------------------------------------------|---------------|---------|---------|---------|---------|----------------|-------------|----------------------|---------------------|----------------------|
|                                                             | Pre-COVID-19  |         |         |         |         | COVID-19       |             |                      |                     |                      |
|                                                             | 2015/16       | 2016/17 | 2017/18 | 2018/19 | 2019/20 | Mean (a)       | 2020/21 (b) | Percent change b – a | 2021/22 (c)         | Percent change c – a |
| <i>Laboratory</i>                                           |               |         |         |         |         |                |             |                      |                     |                      |
| Cases (SGSS) <sup>†</sup>                                   | 7,692         | 7,453   | 7,657   | 9,114   | 11,571  | <b>8,697</b>   | 47          | <b>-99.5%</b>        | 8,097               | <b>-6.9%</b>         |
| <1yrs                                                       | 6222          | 6009    | 5875    | 6875    | 7793    | 6,555          | 22          | -99.7%               | 4,641               | -29.2%               |
| 1-4yrs                                                      | 1465          | 1443    | 1775    | 2229    | 3773    | 2,137          | 25          | -98.8%               | 3,455               | +61.7%               |
| Test-positivity (RDS)*                                      | 25.8%         | 28.6%   | 20.8%   | 22.5%   | 21.1%   | <b>23.4%</b>   | 0.1%        | <b>-99.6%</b>        | 10.1%               | <b>-57.0%</b>        |
| Positive tests                                              | 2,791         | 2,775   | 2,988   | 3,072   | 2,619   | 2,849          | 7           | -99.8%               | 2,027               | -28.9%               |
| Total tests                                                 | 10,805        | 9,686   | 14,381  | 13,640  | 12,398  | 12,182         | 7,094       | -41.8%               | 20,134              | +65.3%               |
| <i>Clinical</i>                                             |               |         |         |         |         |                |             |                      |                     |                      |
| Admissions for RSV-attributable respiratory disease (HES)   | 103,948       | 93,216  | 99,796  | 108,338 | 106,488 | <b>102,357</b> | 21,924      | <b>-78.6%</b>        | 63,478 <sup>^</sup> | <b>-38.0%</b>        |
| <1yrs                                                       | 49,210        | 48,294  | 48,248  | 51,771  | 50,849  | 49,674         | 8,494       | -82.9%               | 28,371 <sup>^</sup> | -42.9%               |
| 1-4yrs                                                      | 54,738        | 44,922  | 51,548  | 56,567  | 55,639  | 55,639         | 13,430      | -75.9%               | 35,107 <sup>^</sup> | -36.9%               |
| <i>Syndromic</i>                                            |               |         |         |         |         |                |             |                      |                     |                      |
| NHS 111 calls for cough                                     | 136,409       | 109,622 | 121,839 | 127,836 | 127,696 | <b>124,680</b> | 34,483      | <b>-72.3%</b>        | 130,905             | <b>+5.0%</b>         |
| <1yrs                                                       | 44,646        | 40,258  | 41,619  | 41,626  | 40,800  | 41,790         | 10,730      | -74.3                | 38432               | -8.0%                |
| 1-4yrs                                                      | 91,763        | 69,364  | 80,220  | 86,210  | 86,896  | 82,891         | 23,753      | -71.3                | 92473               | +11.6%               |
| GP out-of-hours contacts for acute bronchitis/bronchiolitis | 5,431         | 4,980   | 4,152   | 4,312   | 3,368   | <b>4,449</b>   | 369         | <b>-91.7%</b>        | 1,664               | <b>-62.6%</b>        |
| <1yrs                                                       | 3,957         | 3,652   | 2,998   | 3,133   | 2,502   | 3,248          | 205         | -93.7%               | 1,086               | -66.6%               |
| 1-4yrs                                                      | 1,474         | 1,328   | 1,154   | 1,179   | 866     | 1,200          | 164         | -86.3%               | 578                 | -51.8%               |
| GP in-hours consultations for URTI/LRTI                     | 115,294       | 107,142 | 107,385 | 104,937 | 101,681 | <b>107,288</b> | 10,248      | <b>-90.4%</b>        | 50,714              | <b>-52.7%</b>        |
| <1yrs                                                       | 29,566        | 29,674  | 27,501  | 26,984  | 24,886  | 27,722         | 2,844       | -89.7%               | 11,636              | -58.0%               |
| 1-4yrs                                                      | 85,728        | 77,468  | 79,884  | 77,953  | 76,795  | 79,566         | 7,404       | -90.7%               | 39,078              | -50.9%               |
| ED attendances for acute bronchitis/bronchiolitis           | ..            | ..      | ..      | 31,583  | 29,848  | <b>30,716</b>  | 4,740       | <b>-84.6%</b>        | 23,283              | <b>-24.2%</b>        |
| <1yrs                                                       | ..            | ..      | ..      | 24,459  | 23,964  | 24,212         | 3,399       | -86.0%               | 18,654              | -23.0%               |
| 1-4yrs                                                      | ..            | ..      | ..      | 7,124   | 5,884   | 6,504          | 1,341       | -79.4%               | 4,629               | -28.8%               |

<sup>†</sup> Total cases (SGSS) does not match the sum of <1yrs and 1-4yrs (0.06% difference) due to some records with specific age not available

\*Age breakdown not available

<sup>^</sup>HES data up until 28 February 2022 (latest available at time of extraction)

**Supplementary Table 3: Total indicator activity during summer seasons (week 11-39) among children under five years-old since 2015, and percentage change for 2021 and 2022**

| Indicator and age group                                     | Summer season |        |        |        |        |               |          |                      |          |                      |
|-------------------------------------------------------------|---------------|--------|--------|--------|--------|---------------|----------|----------------------|----------|----------------------|
|                                                             | Pre-COVID-19  |        |        |        |        |               | COVID-19 |                      |          |                      |
|                                                             | 2015          | 2016   | 2017   | 2018   | 2019   | Mean (a)      | 2020 (b) | Percent change b – a | 2021 (c) | Percent change c – a |
| <i>Laboratory</i>                                           |               |        |        |        |        |               |          |                      |          |                      |
| Cases (SGSS) <sup>†</sup>                                   | 393           | 637    | 406    | 843    | 429    | <b>542</b>    | 51       | <b>-90.6%</b>        | 12,150   | <b>+2143.4%</b>      |
| <1yrs                                                       | 295           | 467    | 293    | 546    | 260    | 372           | 31       | -91.7%               | 6,094    | +1537.3%             |
| 1-4yrs                                                      | 98            | 169    | 113    | 297    | 168    | 169           | 20       | -88.2%               | 6,055    | +3482.8%             |
| Test-positivity (RDS)*                                      | 1.9%          | 2.5%   | 2.4%   | 3.4%   | 1.3%   | <b>2.3%</b>   | 1.6%     | <b>-30.4%</b>        | 13.8%    | <b>+500.0%</b>       |
| Positive tests                                              | 126           | 220    | 163    | 381    | 142    | 206           | 9        | -95.6%               | 3,755    | +1,722.8%            |
| Total tests                                                 | 6,628         | 8,834  | 6,824  | 11,079 | 10,830 | 8,839         | 550      | -93.8                | 27,304   | +208.9%              |
| <i>Clinical</i>                                             |               |        |        |        |        |               |          |                      |          |                      |
| Admissions for RSV-attributable respiratory disease (HES)   | 56,210        | 63,029 | 59,819 | 61,443 | 67,867 | <b>61,674</b> | 2,940    | <b>-95.2%</b>        | 78,370   | <b>+27.1%</b>        |
| <1yrs                                                       | 21,447        | 24,194 | 22,518 | 23,623 | 25,756 | 23,508        | 1,138    | -95.2%               | 30,401   | +29.3%               |
| 1-4yrs                                                      | 34,763        | 38,835 | 37,301 | 37,820 | 42,111 | 38,166        | 1,802    | -95.3%               | 47,969   | +25.7%               |
| <i>Syndromic</i>                                            |               |        |        |        |        |               |          |                      |          |                      |
| NHS 111 calls for cough                                     | 61,147        | 72,033 | 61,141 | 59,971 | 67,462 | <b>64,351</b> | 35,296   | <b>-45.2%</b>        | 152,070  | <b>+136.3%</b>       |
| <1yrs                                                       | 21,610        | 25,289 | 21,805 | 22,366 | 22,839 | 22,782        | 10,132   | -55.5%               | 36,293   | +59.3%               |
| 1-4yrs                                                      | 39,537        | 46,744 | 39,336 | 37,605 | 44,623 | 41,569        | 25,164   | -39.5%               | 115,777  | +178.5%              |
| GP out-of-hours contacts for acute bronchitis/bronchiolitis | 1,963         | 1,751  | 1,493  | 1,419  | 1,260  | <b>1,577</b>  | 369      | <b>-76.6%</b>        | 1,458    | <b>-7.6%</b>         |
| <1yrs                                                       | 1,216         | 1,081  | 952    | 933    | 838    | 1,004         | 236      | -76.5%               | 893      | -11.1%               |
| 1-4yrs                                                      | 747           | 670    | 541    | 486    | 422    | 573           | 133      | -76.8%               | 565      | -1.4%                |
| GP in-hours consultations for URTI/LRTI                     | 69,835        | 74,310 | 71,007 | 64,238 | 66,890 | <b>69,256</b> | 11,280   | <b>-83.7%</b>        | 42,185   | <b>-39.1%</b>        |
| <1yrs                                                       | 18,268        | 20,271 | 18,910 | 17,157 | 17,144 | 18,350        | 2,934    | -84.0%               | 9,488    | -48.3%               |
| 1-4yrs                                                      | 51,567        | 54,039 | 52,097 | 47,081 | 49,746 | 50,906        | 8,346    | -83.6%               | 32,697   | -35.8%               |
| ED attendances for acute bronchitis/bronchiolitis           |               |        |        | 8924   | 12034  | <b>10,479</b> | 4,526    | <b>-56.8%</b>        | 21,319   | <b>+103.4%</b>       |
| <1yrs                                                       | ..            | ..     | ..     | 5721   | 8532   | 7,127         | 3,416    | -52.1%               | 16,153   | +126.6%              |
| 1-4yrs                                                      | ..            | ..     | ..     | 3203   | 3502   | 3,353         | 1,110    | -66.9%               | 5,166    | +54.1%               |

<sup>†</sup> Total cases (SGSS) does not match the sum of <1yrs and 1-4yrs (0.02% difference) due to some records with specific age not available

\*Age breakdown not available

**Supplementary Figure 1. RSV-associated indicator activity among children under five years-old monitored through laboratory reports, hospital admissions and syndromic surveillance (NHS 111, GP out-of-hours, GP in-hours, emergency department) by age group, 2015-2022**

*Note the y-axis scale varies in each visualisation*

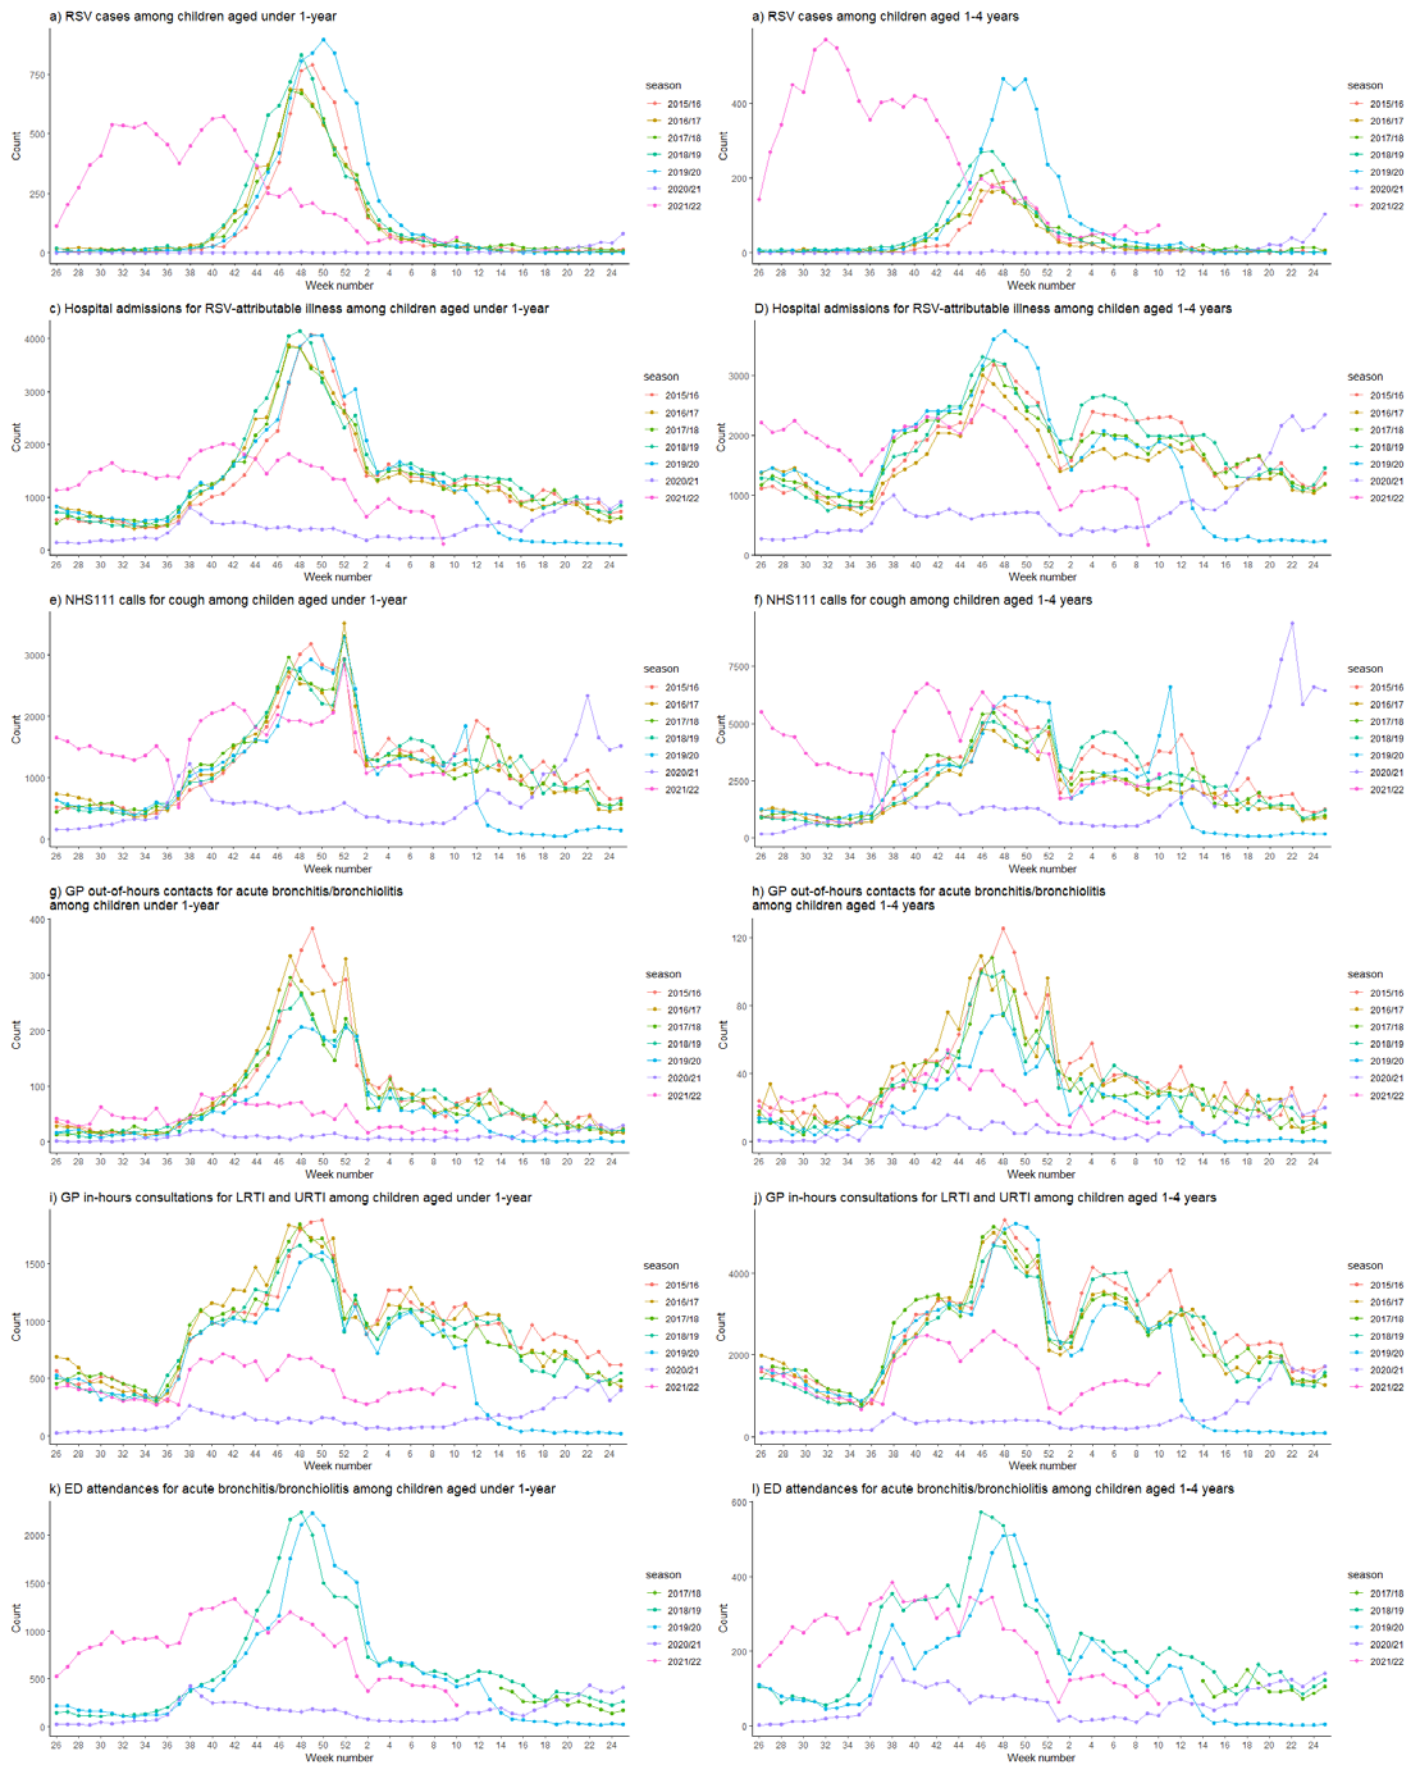

**Supplementary Table 4: Interrupted time series analyses of predicted versus observed RSV-associated indicator activity during COVID-19 (since week 11 2020) among children under five years-old in England reported to laboratory, clinical and syndromic surveillance systems**

| Indicator and data source                                                 | Predicted (modelled) indicator activity from week 11 2020 to latest available data <sup>¥</sup><br>{95% prediction interval} | Actual (observed) indicator activity | Absolute difference in indicator activity (observed – predicted) | % change<br>{95% prediction interval} |
|---------------------------------------------------------------------------|------------------------------------------------------------------------------------------------------------------------------|--------------------------------------|------------------------------------------------------------------|---------------------------------------|
| <b>Laboratory</b>                                                         |                                                                                                                              |                                      |                                                                  |                                       |
| Total number of cases (SGSS)                                              | 23,033 {22,823, 23,242}                                                                                                      | 20,441                               | -2,592                                                           | <b>-11.3%</b> {-11.4, -11.2}          |
| Mean percentage test positivity (RDS)                                     | 12.4% {N/A}                                                                                                                  | 9.7%                                 | -2.7%                                                            | <b>-21.8%</b> {N/A}                   |
| <b>Clinical</b>                                                           |                                                                                                                              |                                      |                                                                  |                                       |
| Total number of admissions for RSV-attributable respiratory disease (HES) | 364,855 {364,639, 365,072}                                                                                                   | 186,280                              | -178,575                                                         | <b>-48.9%</b> {-49.0%, -48.9%}        |
| <b>Syndromic</b>                                                          |                                                                                                                              |                                      |                                                                  |                                       |
| Total number of NHS 111 calls for cough                                   | 393,837 {393,618, 394,056}                                                                                                   | 352,754                              | -41,083                                                          | <b>-10.4%</b> {-10.4, -10.4}          |
| Total GP out-of-hours consultations for acute bronchitis/bronchiolitis    | 8,366 {8,149, 8,584}                                                                                                         | 3,860                                | -4,506                                                           | <b>-53.9%</b> {-55.3, -52.5}          |
| Total GP in-hours consultations for URTI and LRTI                         | 329,061 {328,840, 329,282}                                                                                                   | 114,427                              | -214,634                                                         | <b>-65.2%</b> {-65.3, -65.2}          |
| Total number of ED attendances for acute bronchitis/bronchiolitis         | 86,884 {86,674, 87,094}                                                                                                      | 53,868                               | -33,016                                                          | <b>-38.0%</b> {-38.1, -37.9}          |

<sup>^</sup> Prediction intervals not estimated due to repeated zero counts in weekly reports

<sup>¥</sup> latest available data is up until the end of week 10 2022 for all data sources, apart from HES, which is until the end of week 9 2022.

**Supplementary Table 5: Denominator data during summer seasons (week 11-39) and winter seasons (week 40-10) among children under five years-old in England reported to clinical and syndromic surveillance systems**

| Indicator and age group                                                       | Summer    |           |           |           |            |           |           |
|-------------------------------------------------------------------------------|-----------|-----------|-----------|-----------|------------|-----------|-----------|
|                                                                               | 2015      | 2016      | 2017      | 2018      | 2019       | 2020      | 2021      |
| <i>Clinical</i>                                                               |           |           |           |           |            |           |           |
| Number of coded hospital admissions among children under five years old – HES | 748,197   | 765,789   | 745,618   | 732,755   | 730,593    | 24,353    | 692,018   |
| <1 yrs                                                                        | 509,724   | 523,269   | 509,135   | 494,656   | 491,582    | 16,178    | 480,222   |
| 1-4 yrs                                                                       | 238,473   | 242,520   | 236,483   | 238,099   | 239,011    | 8,175     | 211,796   |
| <i>Syndromic</i>                                                              |           |           |           |           |            |           |           |
| Total number of calls – NHS 111                                               | 879,694   | 936,554   | 927,126   | 972,352   | 982,249    | 784,762   | 1,206,984 |
| <1 yrs                                                                        | 293,805   | 325,035   | 318,600   | 338,295   | 344,442    | 269,432   | 355,407   |
| 1-4 yrs                                                                       | 585,889   | 611,519   | 608,526   | 634,057   | 637,807    | 515,330   | 851,577   |
| Total number of coded consultations – GP out-of-hours                         | 388,606   | 336,611   | 332,582   | 313,536   | 275,520    | 149,969   | 264,189   |
| <1 yrs                                                                        | 125,800   | 113,781   | 110,828   | 103,654   | 91,145     | 56,003    | 77,925    |
| 1-4 yrs                                                                       | 262,806   | 222,830   | 221,754   | 209,882   | 184,375    | 93,966    | 186,264   |
| Number of registered patients- GP in-hours                                    | 8,135,000 | 7,831,755 | 7,793,719 | 7,988,197 | 7,936,310  | 8,212,385 | 7,821,120 |
| <1 yrs                                                                        | 1,442,293 | 1,381,832 | 1,358,749 | 1,367,183 | 1,348,767  | 1,377,261 | 1,351,861 |
| 1-4 yrs                                                                       | 6,692,707 | 6,449,923 | 6,434,970 | 6,621,014 | 6,587,543  | 6,835,124 | 6,469,259 |
| <b>Winter</b>                                                                 |           |           |           |           |            |           |           |
| Indicator and age group                                                       | 2015/16   | 2016/17   | 2017/18   | 2018/19   | 2019/20    | 2020/21   | 2021/22   |
| <i>Clinical</i>                                                               |           |           |           |           |            |           |           |
| Number of coded hospital admissions among children under five years old – HES | 678,514   | 637,611   | 634,301   | 646,675   | 622,912    | 469,824   | 510,816   |
| <1 yrs                                                                        | 450,597   | 428,024   | 420,957   | 417,607   | 409,061    | 351,269   | 346,806   |
| 1-4 yrs                                                                       | 227,917   | 209,587   | 213,344   | 229,068   | 213,851    | 118,555   | 164,010   |
| <i>Syndromic</i>                                                              |           |           |           |           |            |           |           |
| Total number of calls – NHS 111                                               | 998,972   | 920,595   | 1,001,573 | 1,039,693 | 1,014,670  | 628,183   | 1,113,006 |
| <1 yrs                                                                        | 325,400   | 316,509   | 330,297   | 341,892   | 336,447    | 228,167   | 344,739   |
| 1-4 yrs                                                                       | 673,572   | 604,086   | 671,276   | 697,801   | 678,223    | 400,016   | 768,267   |
| Total number of coded consultations – GP out-of-hours                         | 380,809   | 338,851   | 344,828   | 306,555   | 253,643    | 131,227   | 215,947   |
| <1 yrs                                                                        | 119,131   | 112,007   | 108,785   | 96,164    | 79,407     | 50,274    | 64,271    |
| 1-4 yrs                                                                       | 261,678   | 226,844   | 236,043   | 210,391   | 174,236    | 80,953    | 151,676   |
| Number of registered patients– GP in-hours                                    | 9,735,413 | 9,813,028 | 9,824,841 | 9,969,996 | 10,119,998 | 9,915,525 | 9,852,891 |
| <1 yrs                                                                        | 1,707,590 | 1,744,162 | 1,715,894 | 1,724,222 | 1,718,973  | 1,676,966 | 1,653,955 |
| 1-4 yrs                                                                       | 8,027,823 | 8,068,866 | 8,108,947 | 8,245,774 | 8,401,025  | 8,238,559 | 8,198,936 |

**Supplementary Table 6. Time series model equations used in analyses**

| <b>Data source</b>   | <b>Model equation</b>                                                                                                                                                               |
|----------------------|-------------------------------------------------------------------------------------------------------------------------------------------------------------------------------------|
| SGSS                 | glm.nb( n ~ cos52+sin52+sin26+cos26+BH+time, data=sgss_training )                                                                                                                   |
| DataMart             | glm.nb(rsv_pos_0_05 ~ cos52+sin52+cos26+sin26+BH, offset(log(rsv_tot_0_05)), data=datamart_training )<br>glm.nb(rsv_tot_0_05 ~ cos52+sin52+cos26+sin26+BH, data=datamart_training ) |
| HES                  | glm.nb( count ~ cos52+sin52+cos26+sin26+BH+time, offset(log(total)), data=hes_training )                                                                                            |
| NHS 111              | glm.nb( total_cough_5 ~ cos52+sin52+cos26+sin26+BH+time, offset(log(total_calls_5)), data=NHS_U5_training )                                                                         |
| GP out-of-hours      | glm.nb( total_bronchitis_5 ~ cos52+sin52+cos26+sin26+BH+time, offset(log(total_calls_5)),<br>data=Bronch_U5_training )                                                              |
| GP in-hours          | glm.nb( total_infection_5 ~ cos52+sin52+cos26+sin26+BH+time, offset(log(total_pop_5)), data=IH_U5_training )                                                                        |
| Emergency department | glm.nb(total_bronchitis_all ~ cos52+sin52+cos26+sin26+BH+time, data=ED_training )                                                                                                   |



## Data sharing statement

Applications for requests to access relevant anonymised data included in this study should be submitted to the UKHSA Office for Data Release (<https://www.gov.uk/government/publications/accessing-ukhsa-protected-data/accessing-ukhsa-protected-data>).
